# Supplementary material for: Network Biology-Inspired Machine Learning Features Predict Cancer Gene Targets and Reveal Target Coordinating Mechanisms
Source: MDPI journal article supplement (doi:10.3390/ph16050752), 2023-05-16
Supplement: s1 [file s1]

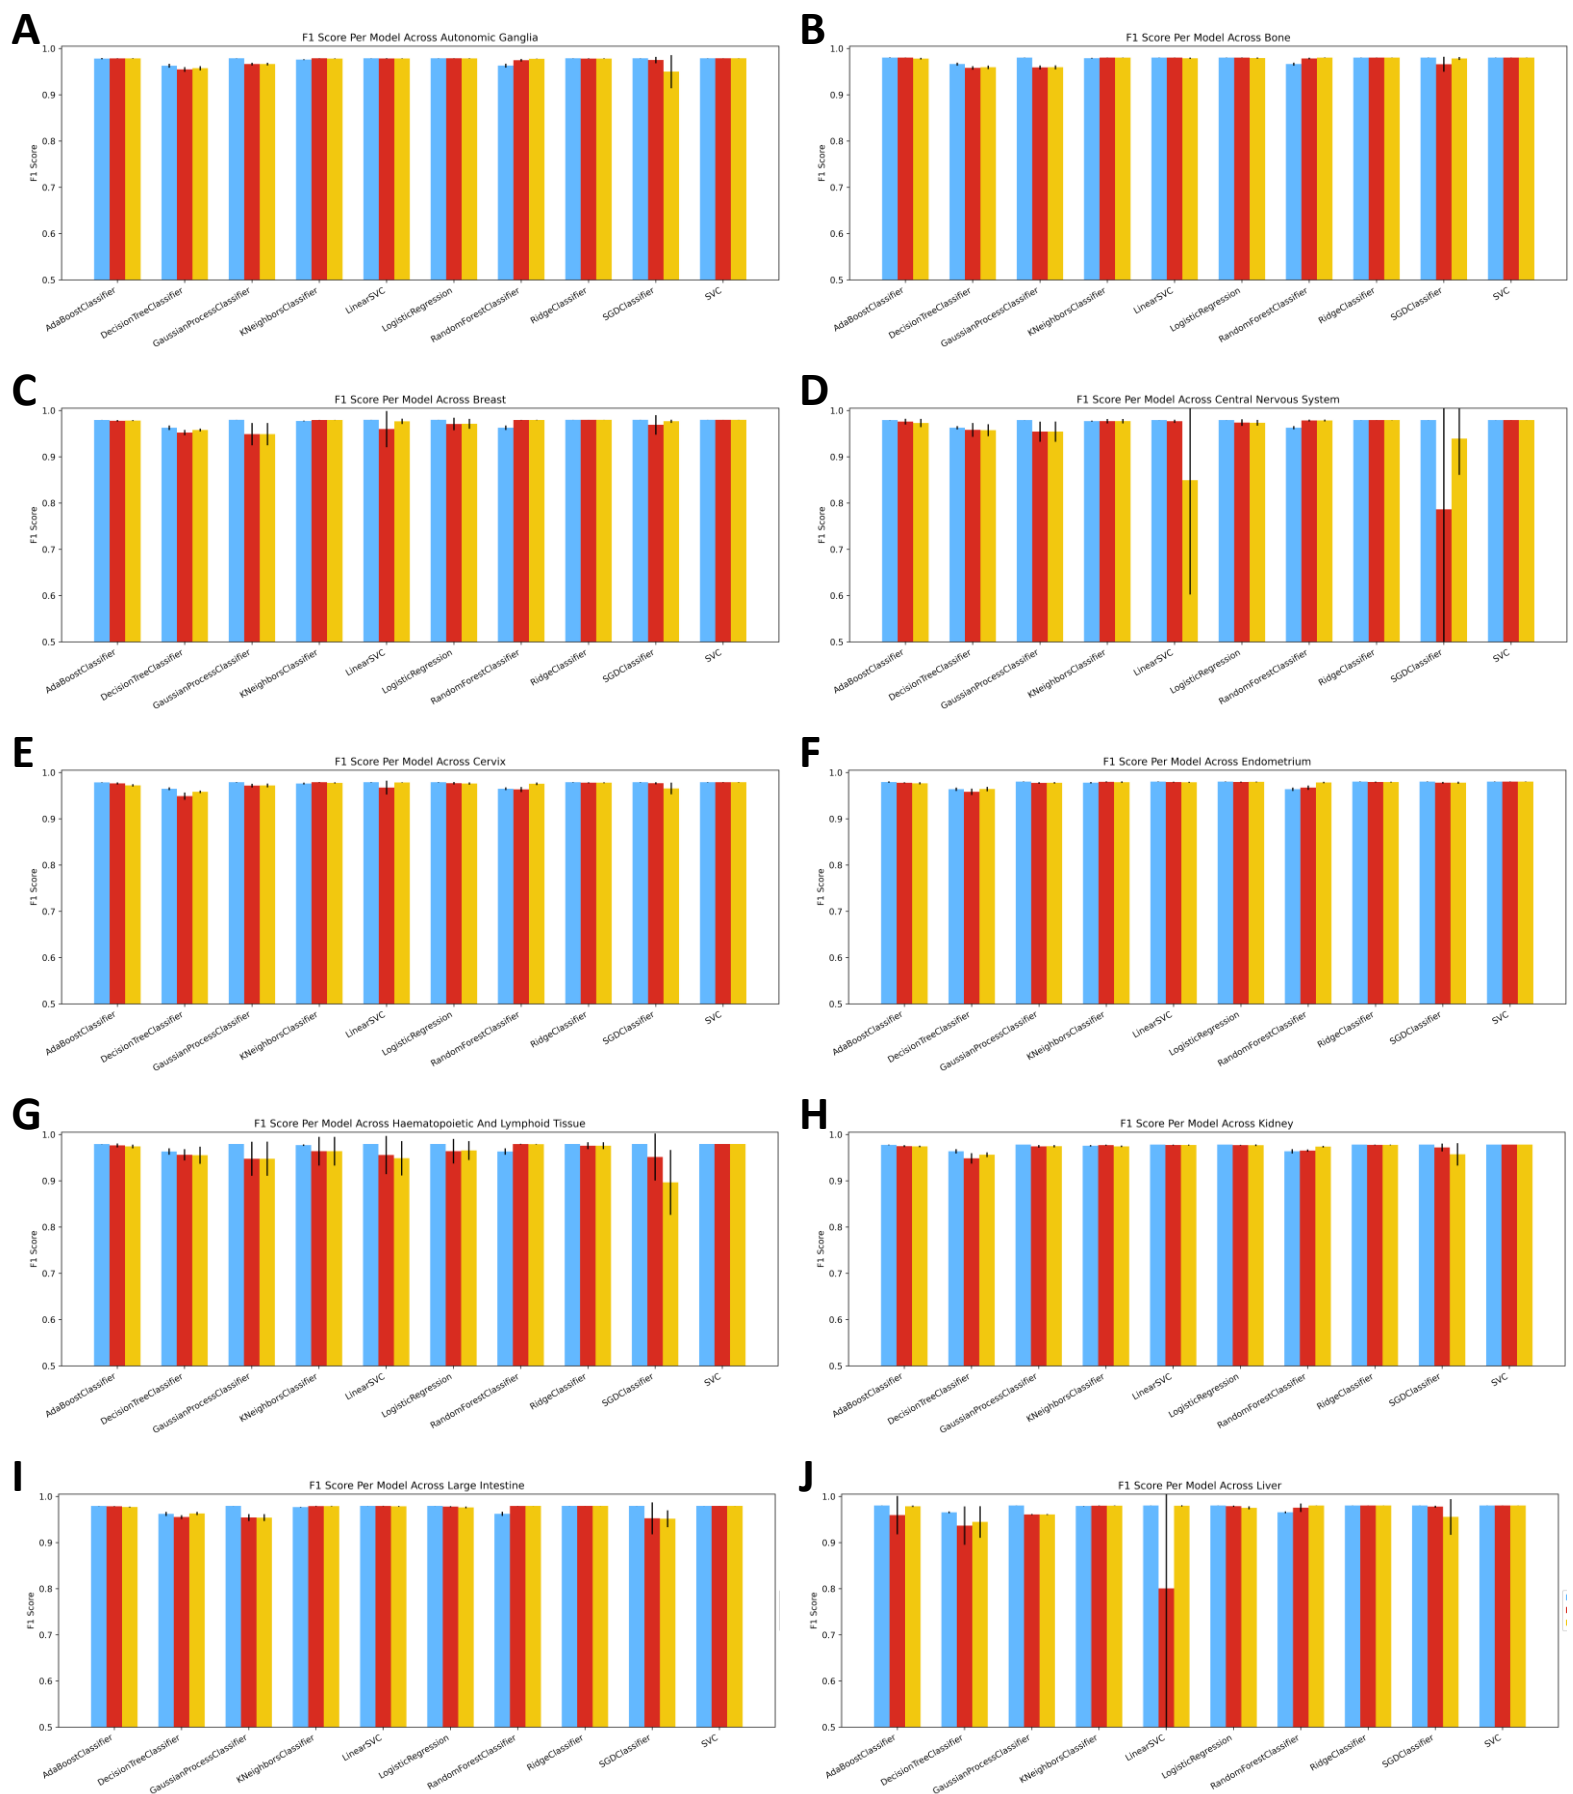

Figure S1

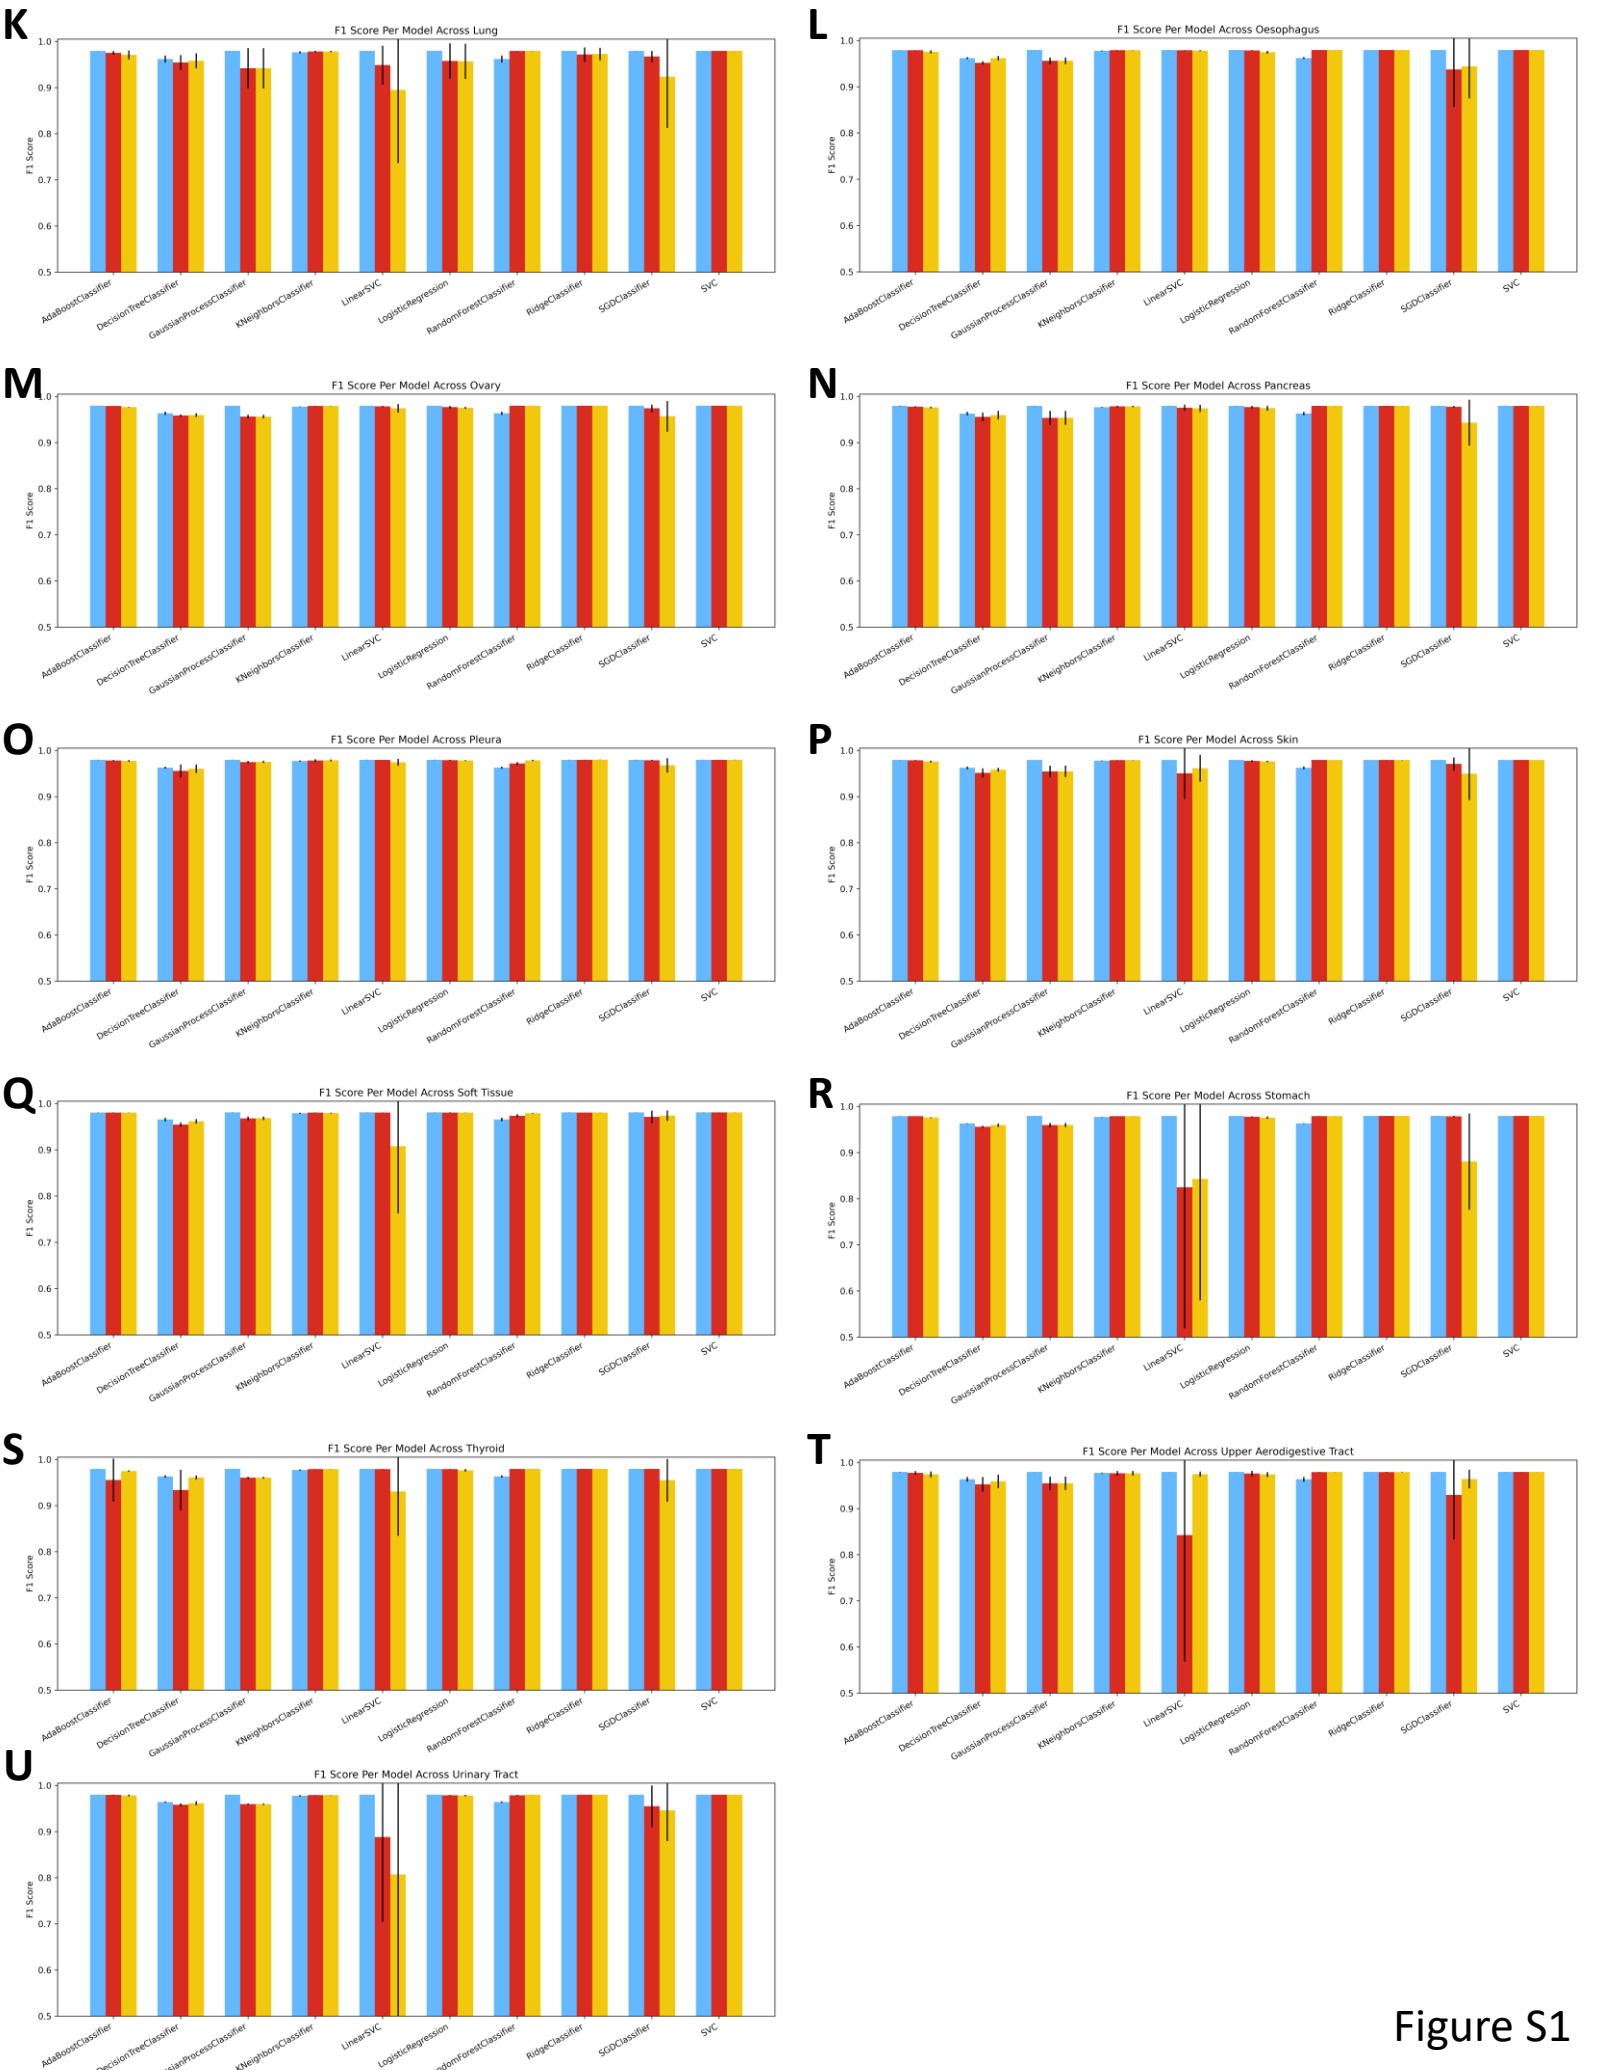

Figure S1

**A** Depmap Cutoff Model Specific Averages

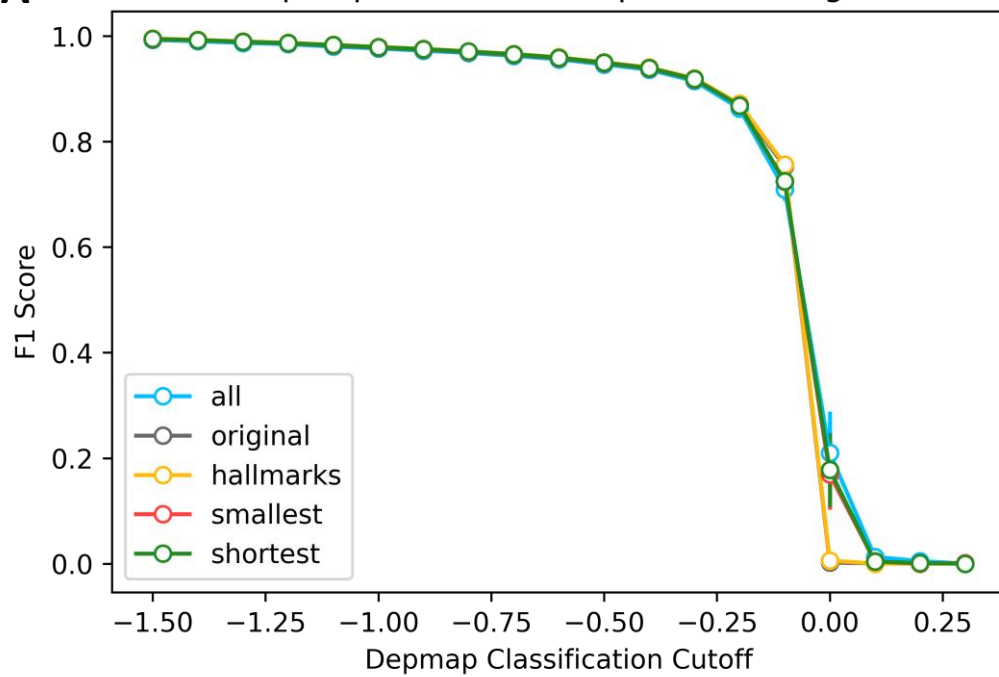

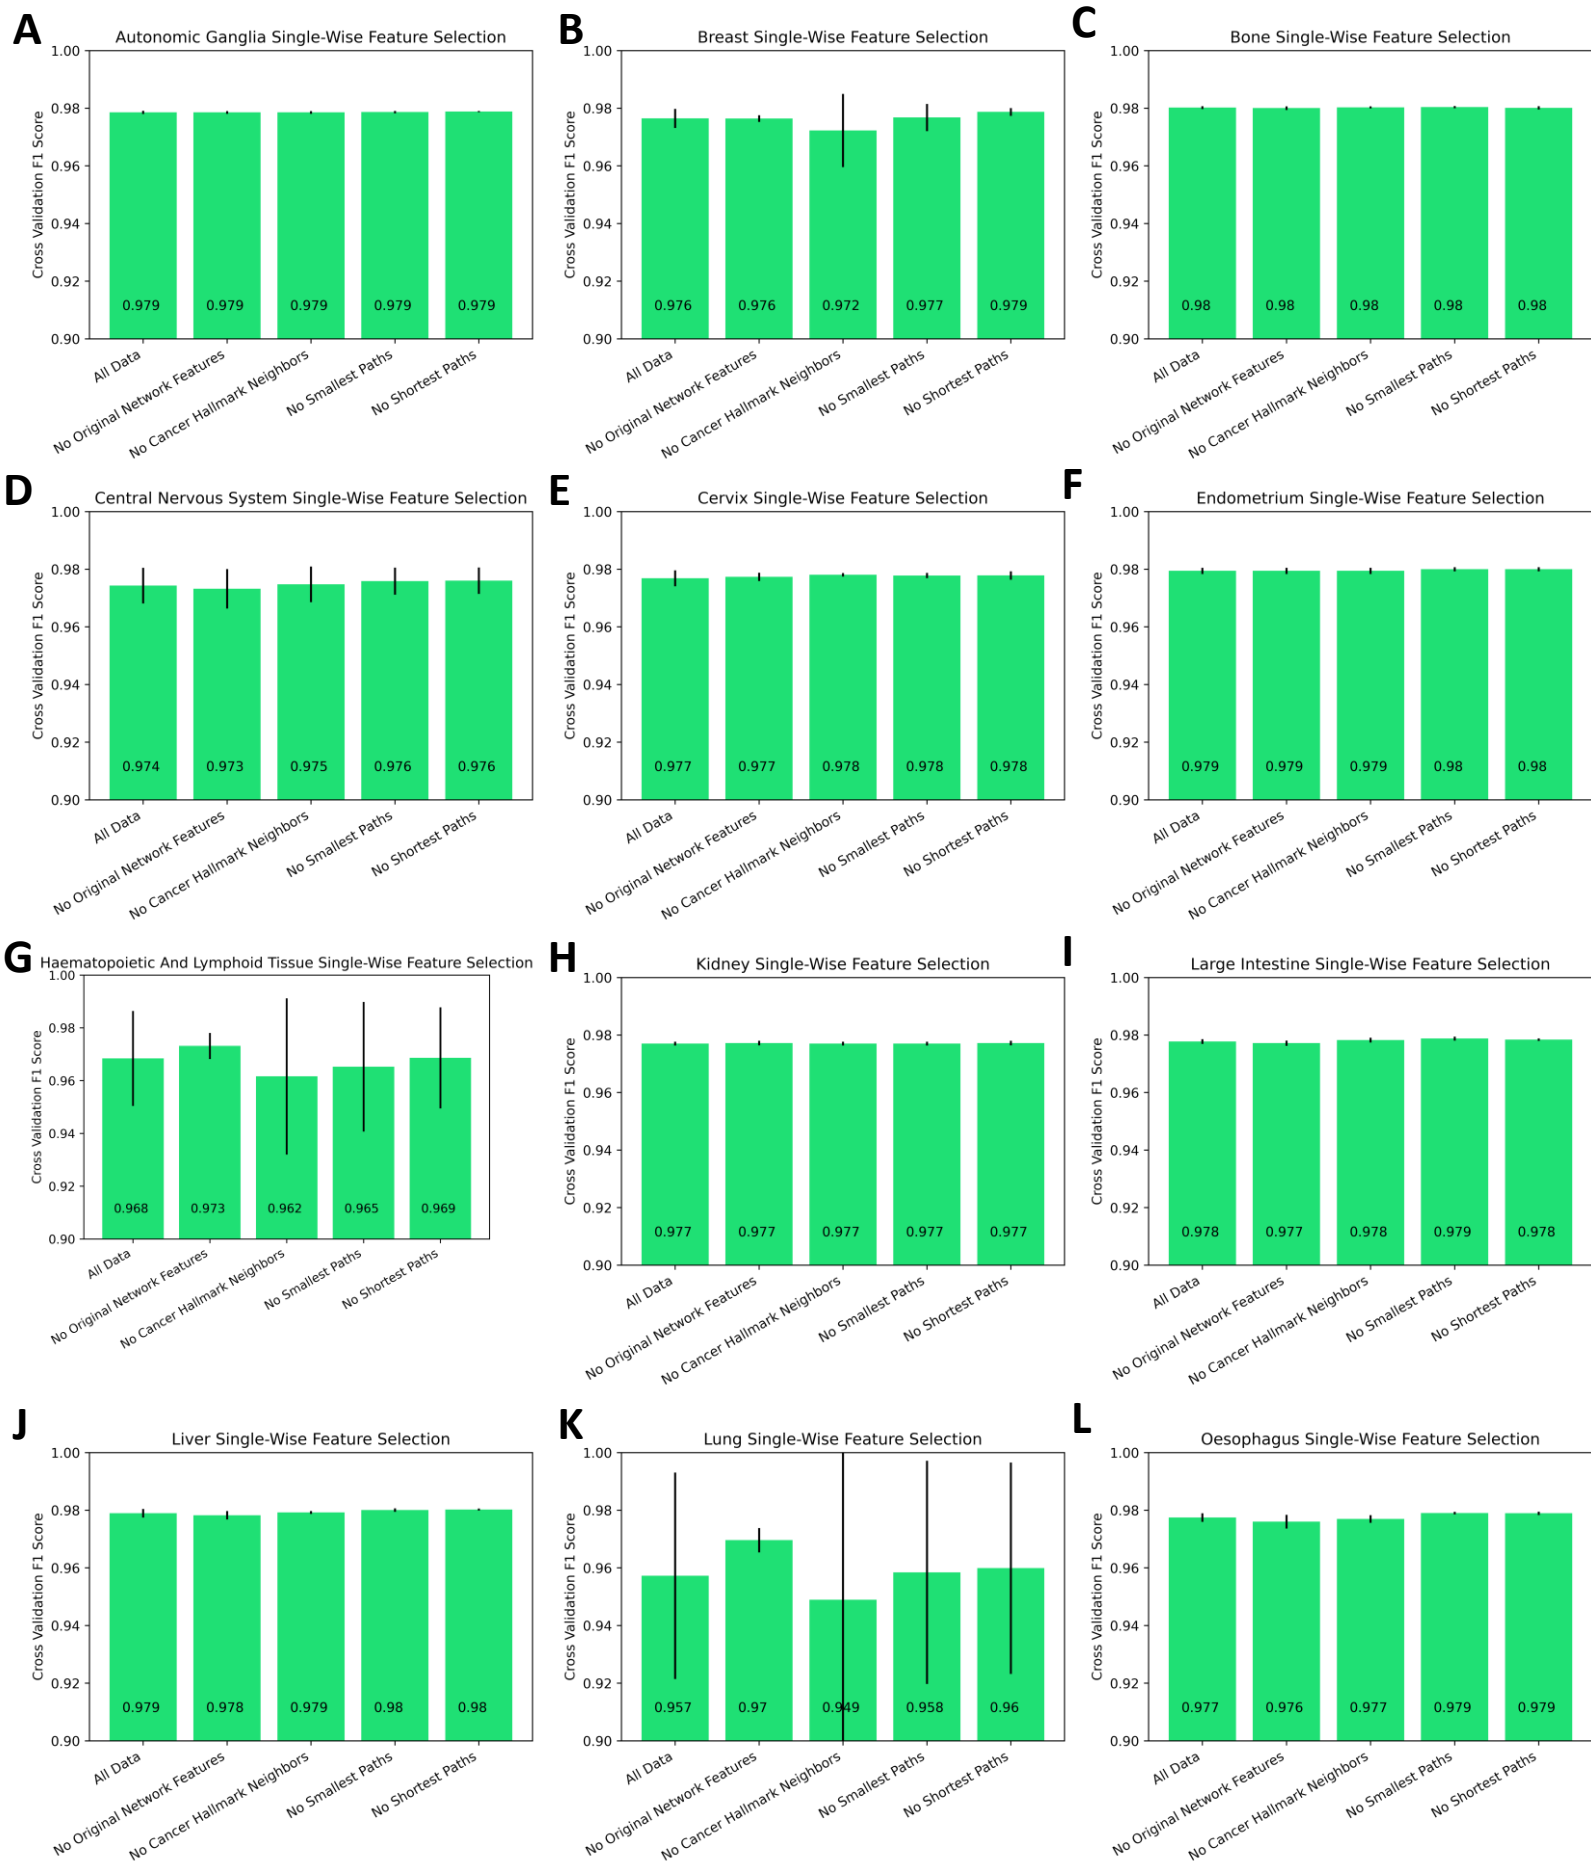

Figure S3

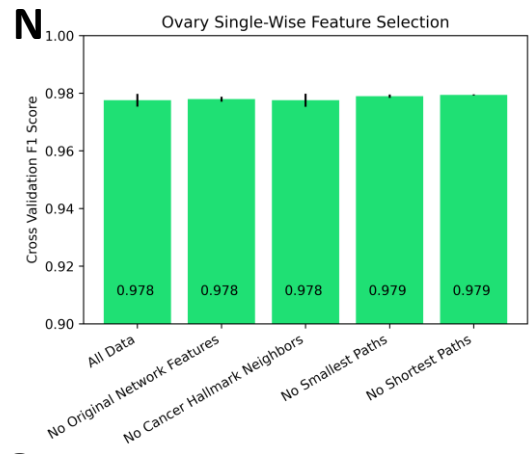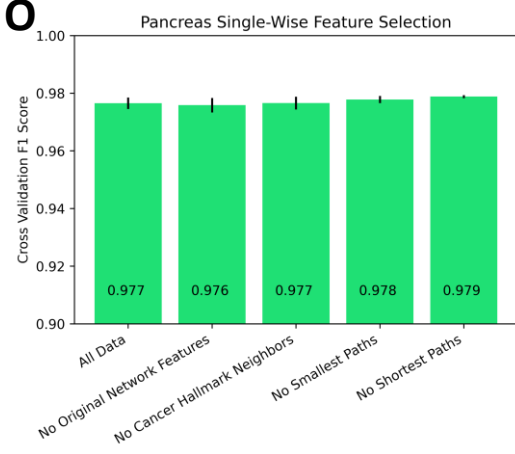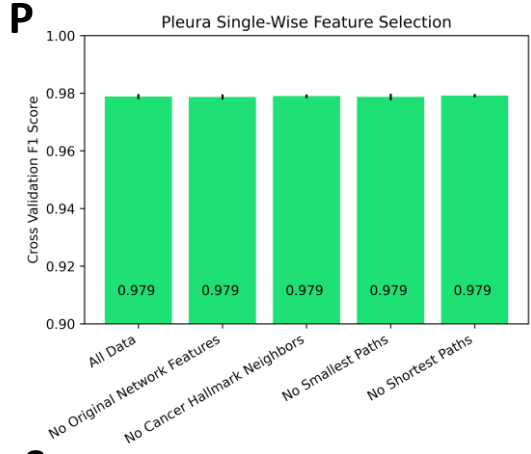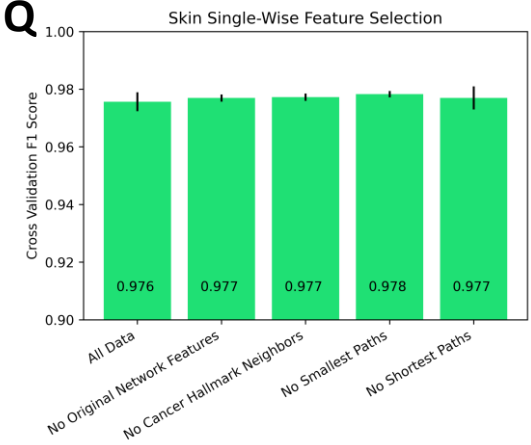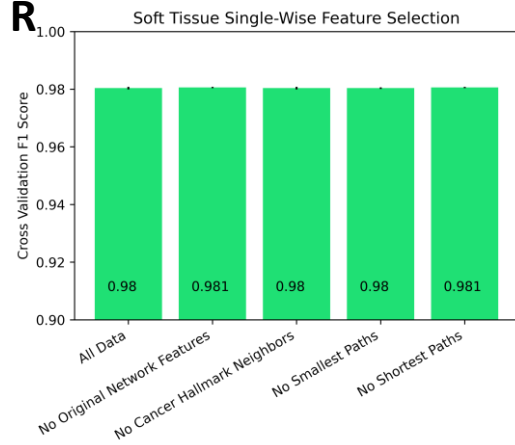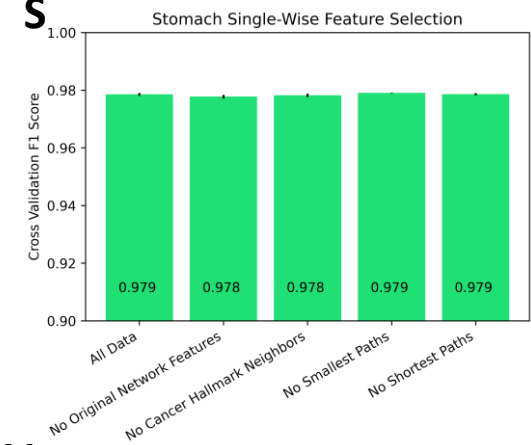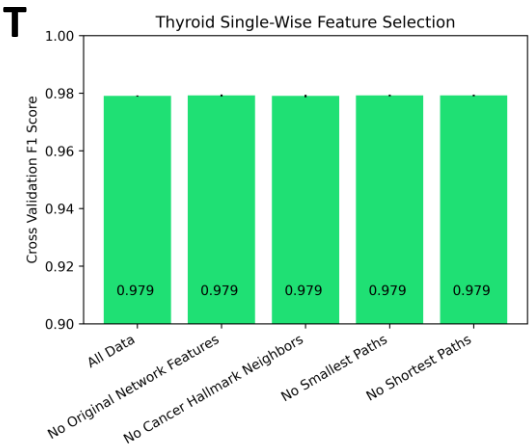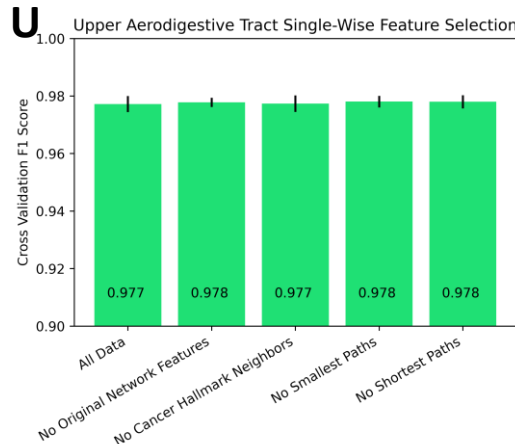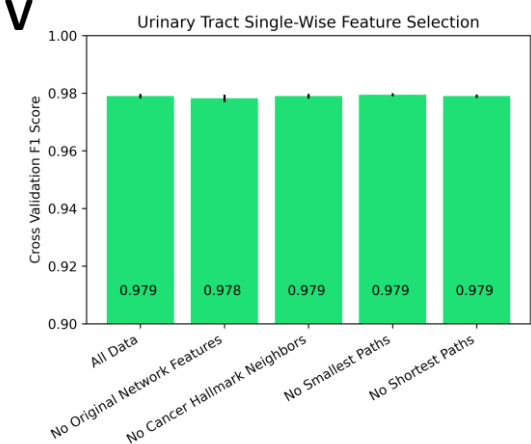

Figure S3

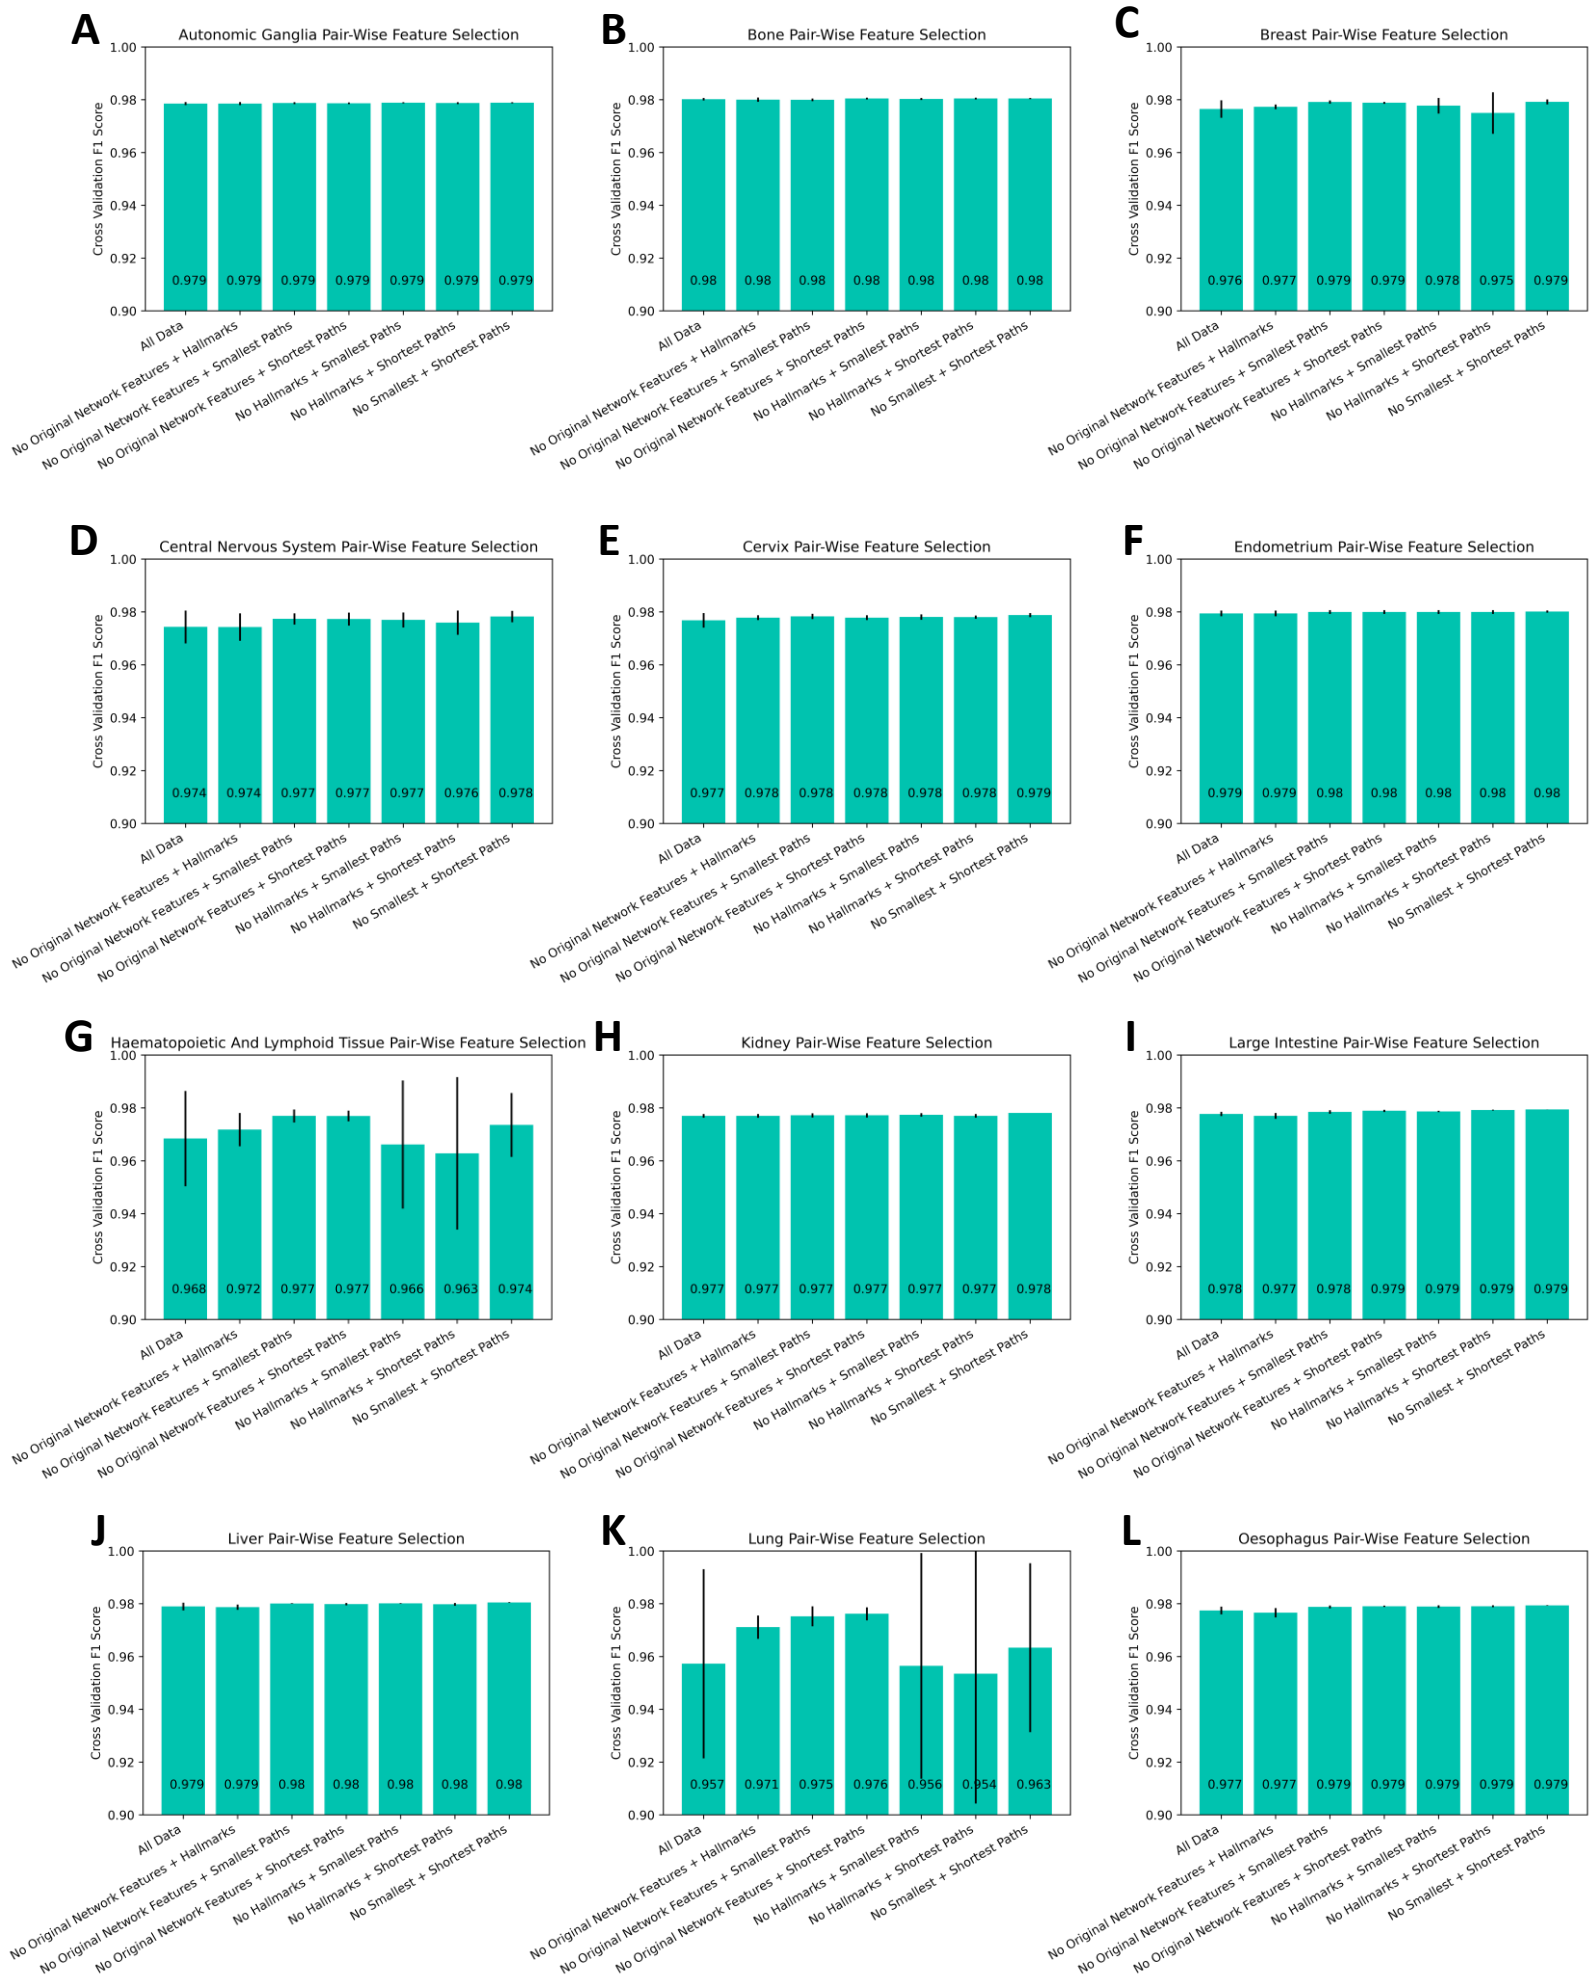

Figure S4

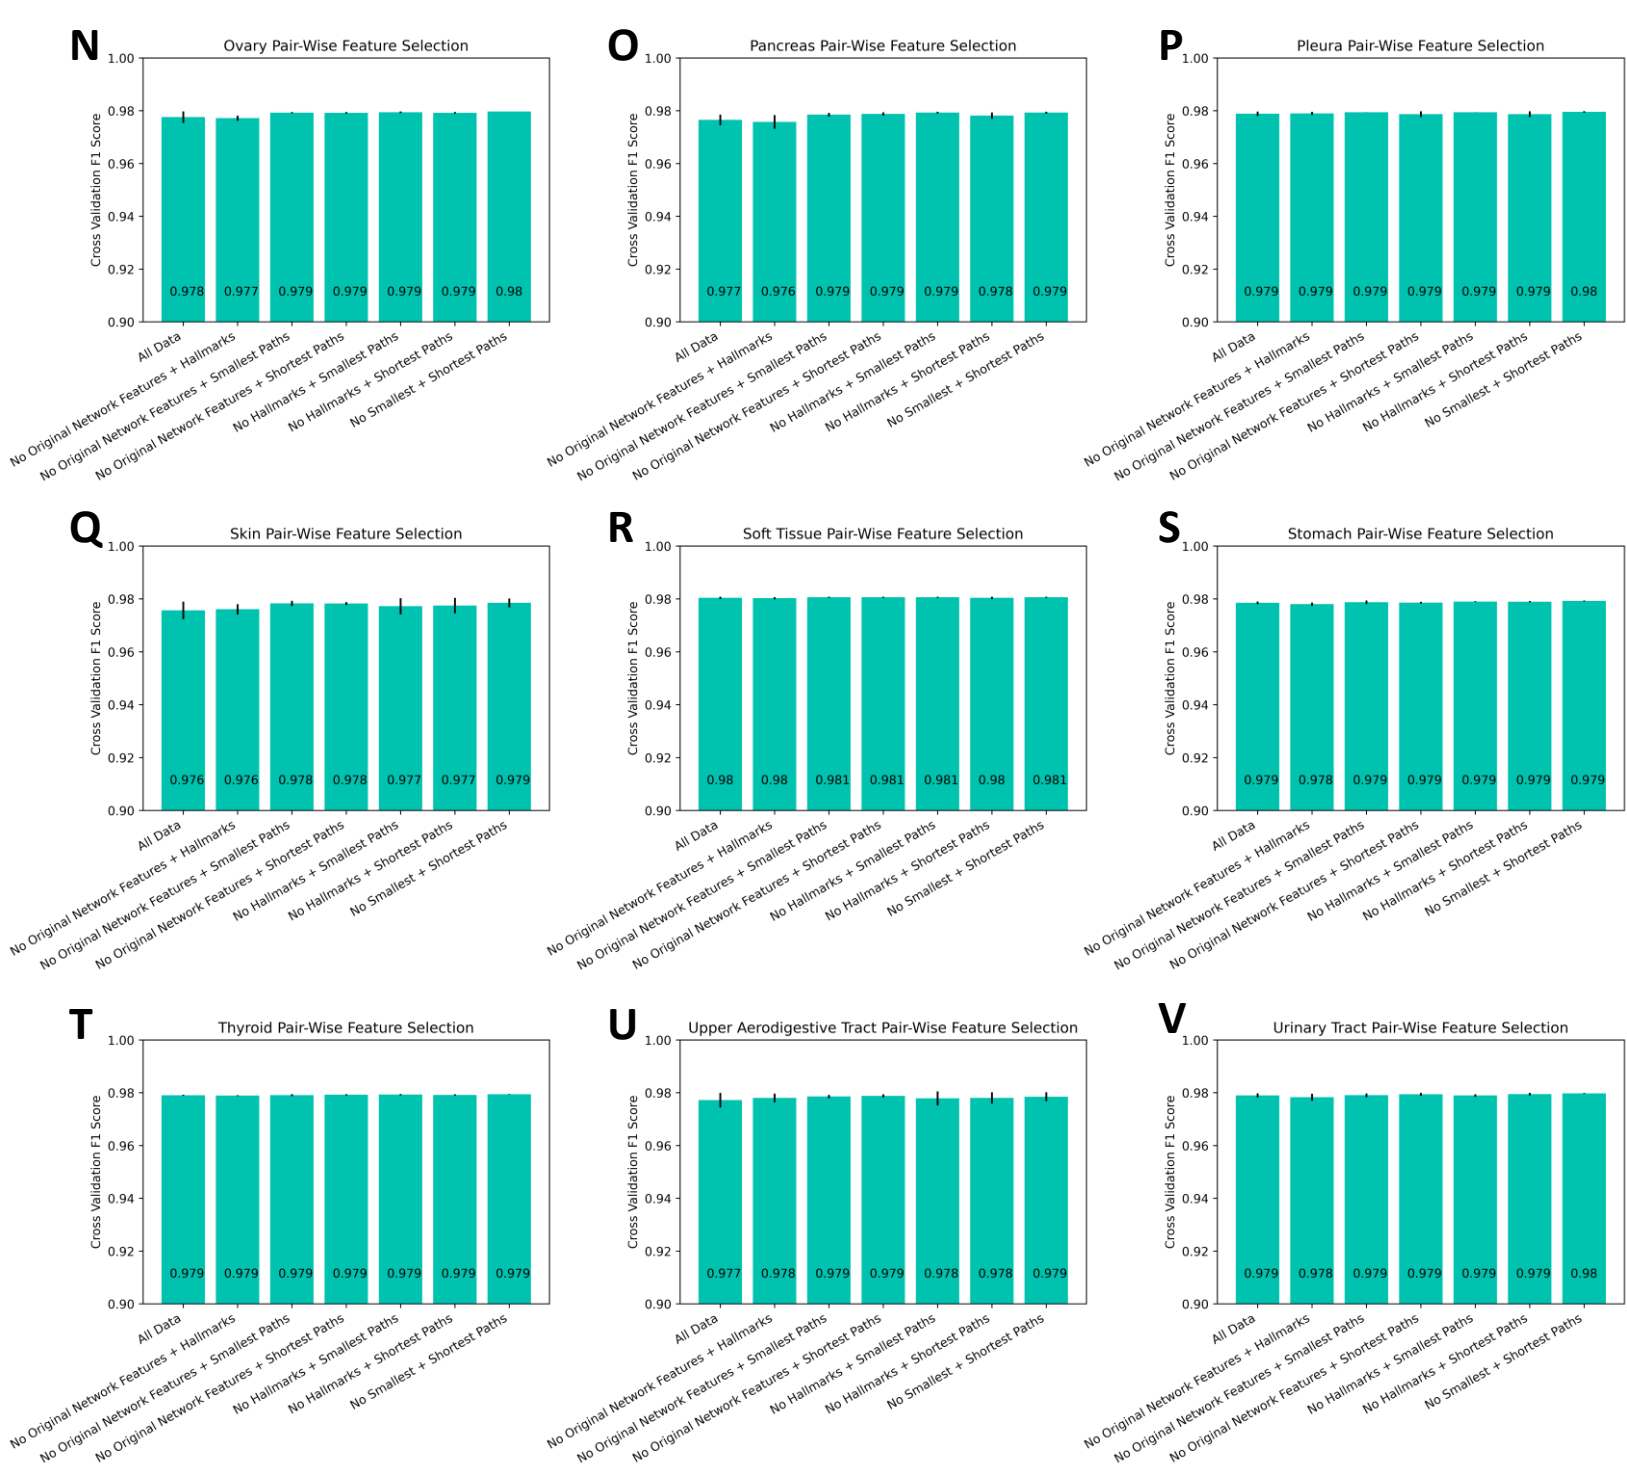

Figure S4

**A**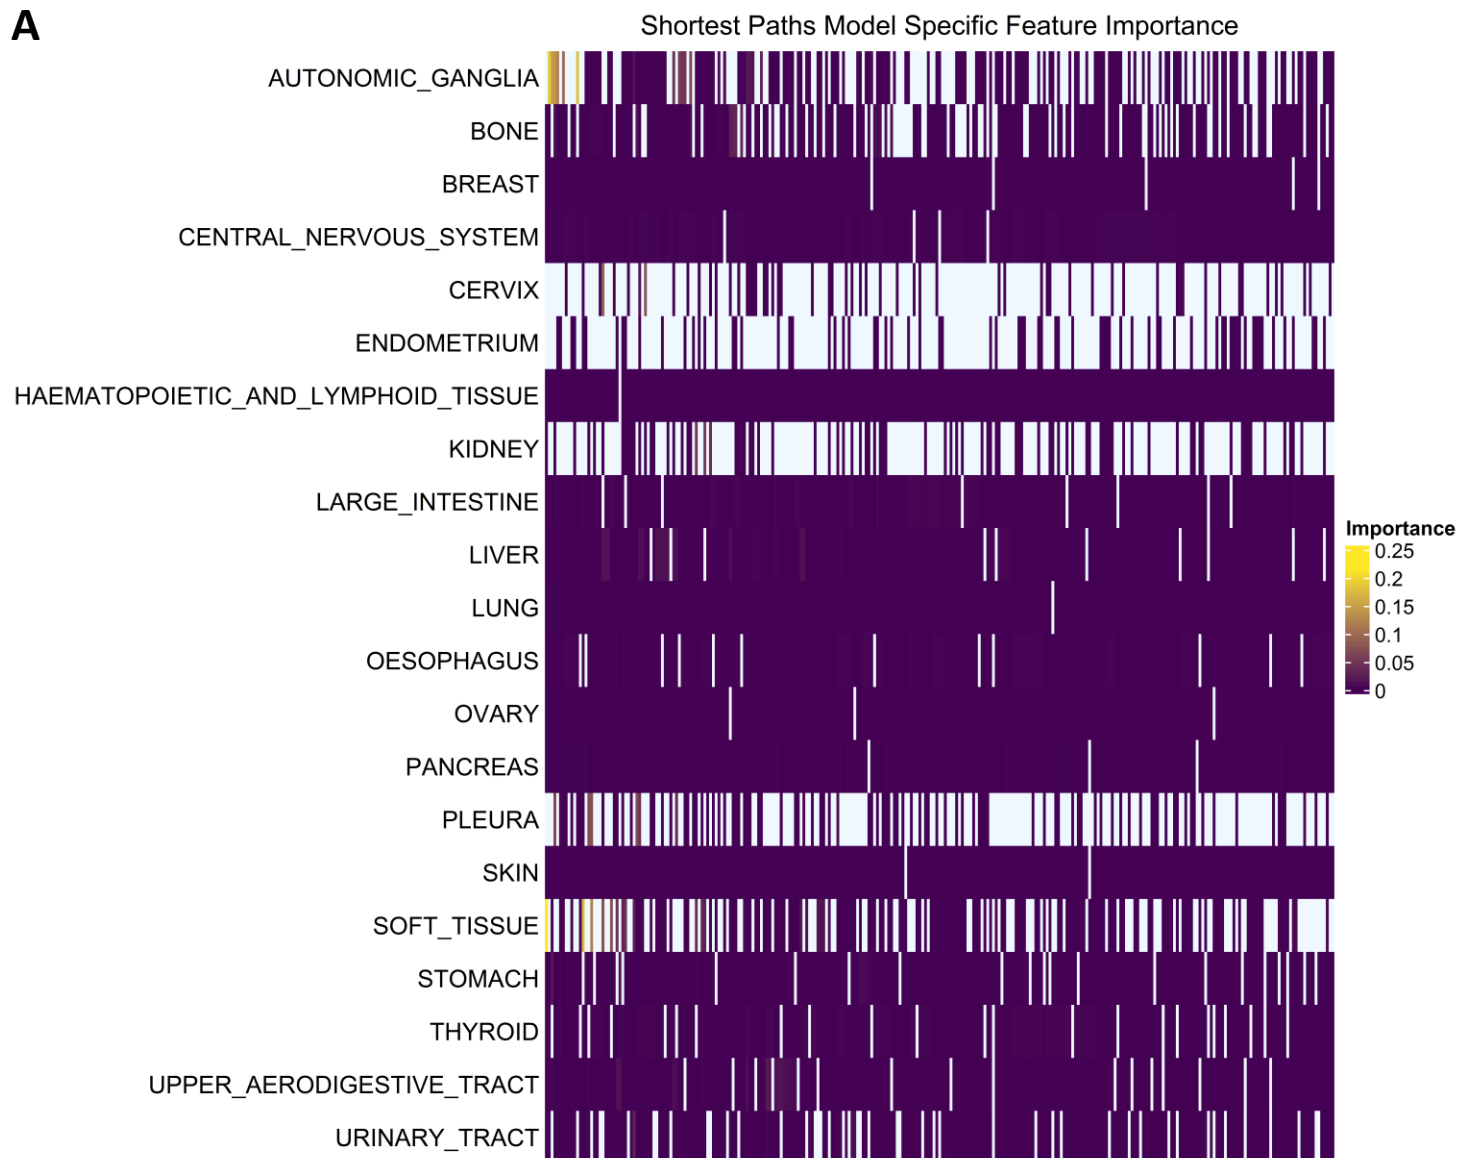

Figure S5



**A**

Smallest Paths Model Specific Feature Importance

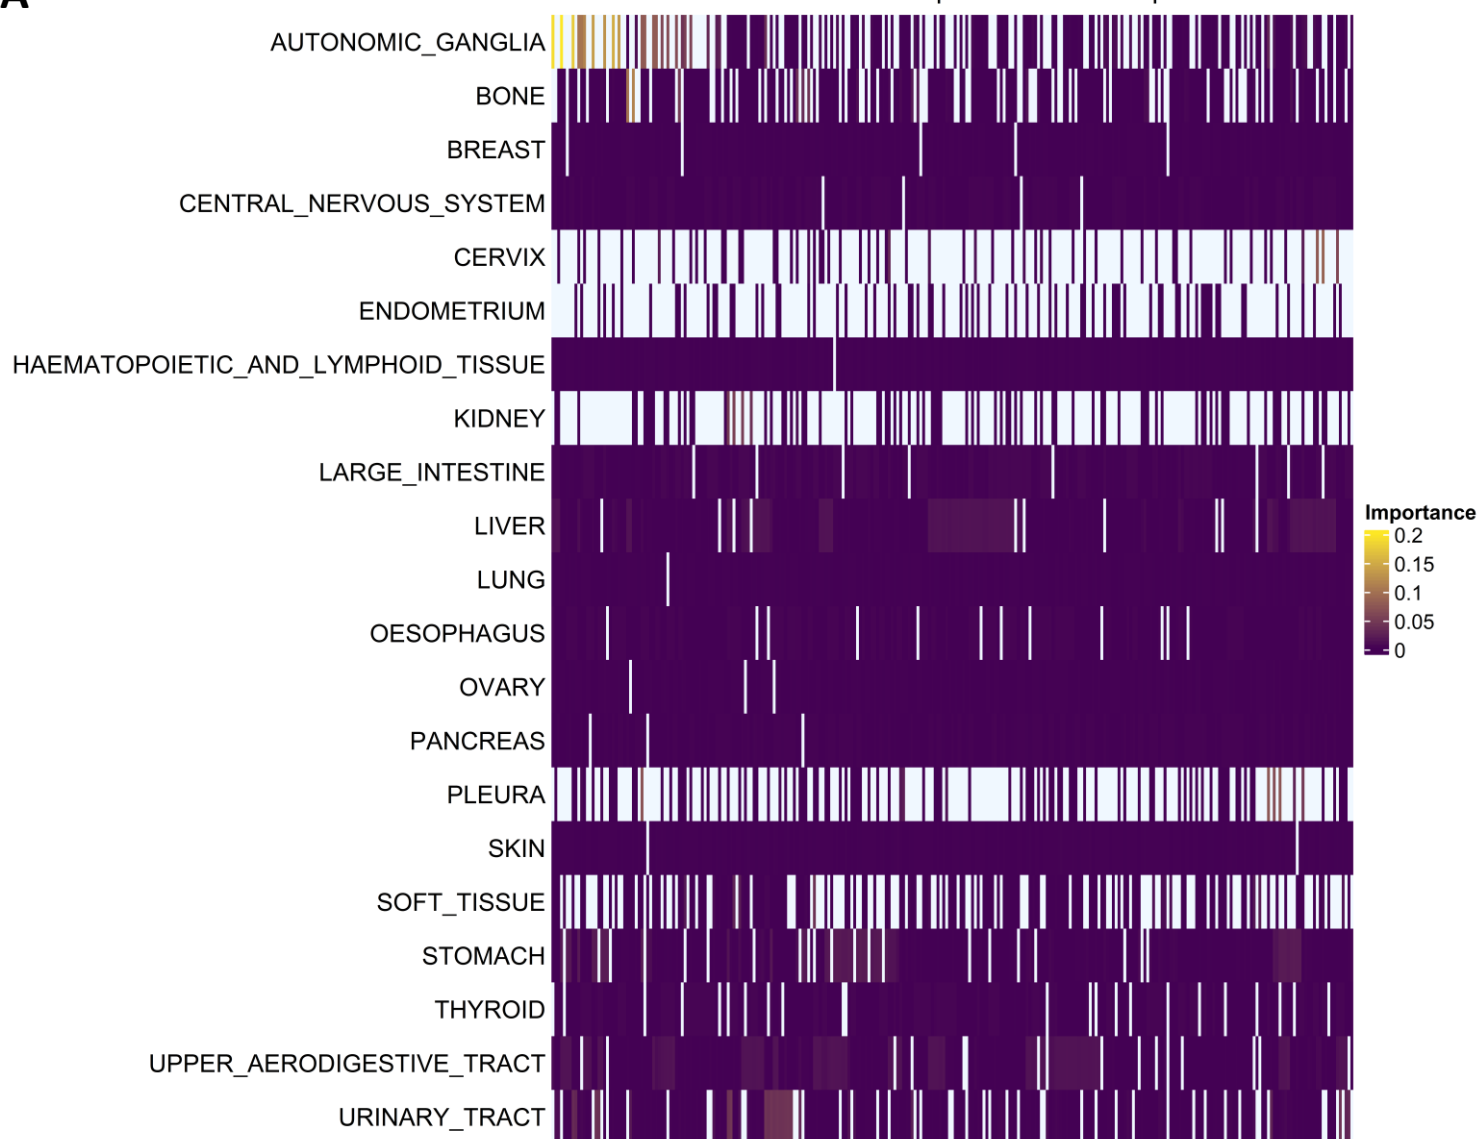

Figure S6
